# Supplementary material
Source: ML conference proceedings conference paper supplement (https://openaccess.thecvf.com/content/CVPR_2019/html/Ribera_Locating_Objects_Without_CVPR_2019_paper.html)
Supplement: Supplementary file 1 [file Ribera_Locating_Objects_Without_CVPR_2019_supplemental.pdf]

# Locating Objects Without Bounding Boxes - Supplemental Material

Javier Ribera, David Güera, Yuhao Chen, Edward J. Delp  
Video and Image Processing Laboratory (VIPER), Purdue University

## Annex: Ablation of terms in the Weighted Hausdorff Distance

In Section 4, we made the following claim:

**Claim.** *Both terms of the Weighed Hausdorff Distance (WHD) are necessary. If the first term is removed, then  $p_x = 1 \ \forall x \in \Omega$  is the solution that minimizes the WHD. If the second term is removed, then the trivial solution is  $p_x = 0 \ \forall x \in \Omega$ .*

*Proof.* If the first term is removed and  $p_x = 1 \ \forall x \in \Omega$ , then Equation (5) reduces to

$$d_{\text{WH}}(p, Y)|_{p=1} = \frac{1}{|Y|} \sum_{y \in Y} M_\alpha [d(x, y)].$$

From the definition in Equation (2),  $\forall x, y \in \Omega$ ,

$$d(x, y) \leq d_{\text{max}}.$$

For any  $p_x \in [0, 1]$  and  $\alpha < 0$ ,

$$\begin{aligned} (1 - p_x)d(x, y) &\leq (1 - p_x)d_{\text{max}} \\ d(x, y) &\leq p_x d_{\text{max}} + (1 - p_x)d_{\text{max}} \\ d(x, y)^\alpha &\geq [p_x d_{\text{max}} + (1 - p_x)d_{\text{max}}]^\alpha \\ \frac{1}{|\Omega|} \sum_{x \in \Omega} d(x, y)^\alpha &\geq \frac{1}{|\Omega|} \sum_{x \in \Omega} [p_x d_{\text{max}} + (1 - p_x)d_{\text{max}}]^\alpha \\ \left[ \frac{1}{|\Omega|} \sum_{x \in \Omega} d(x, y)^\alpha \right]^{\frac{1}{\alpha}} &\leq \left[ \frac{1}{|\Omega|} \sum_{x \in \Omega} [p_x d_{\text{max}} + (1 - p_x)d_{\text{max}}]^\alpha \right]^{\frac{1}{\alpha}} \\ M_\alpha [d(x, y)] &\leq M_\alpha [p_x d_{\text{max}} + (1 - p_x)d_{\text{max}}] \\ \frac{1}{|Y|} \sum_{y \in Y} M_\alpha [d(x, y)] &\leq \frac{1}{|Y|} \sum_{y \in Y} M_\alpha [p_x d_{\text{max}} + (1 - p_x)d_{\text{max}}] \\ d_{\text{WH}}(p, Y)|_{p=1} &\leq d_{\text{WH}}(p, Y). \end{aligned}$$

Note that  $d_{\text{WH}}(p, Y)|_{p=1} > 0$  if  $\alpha > -\infty$ , but the proof holds for any  $\alpha < 0$ .

If the second term is removed and  $p_x = 0 \ \forall x \in \Omega$ , then Equation (5) reduces to

$$d_{\text{WH}}(p, Y)|_{p=0} = \frac{1}{\mathcal{S} + \epsilon} \sum_{x \in \Omega} p_x \min_{y \in Y} d(x, y)|_{p=0} = \frac{1}{0 + \epsilon} 0 = 0.$$

□
